# Supplementary material for: Body Fluid Interferon-γ Release Assay for Diagnosis of Extrapulmonary Tuberculosis in Adults: A Systematic Review and Meta-Analysis
Source: PubMed Central journal article supplement (PMC4621514; doi:10.1038/srep15284), 2015-10-27
Supplement: srep15284-s1.pdf [file srep15284-s1.pdf]

# Body Fluid Interferon- $\gamma$ Release Assay for Diagnosis of Extrapulmonary Tuberculosis in Adults: A Systematic Review and Meta-Analysis

Xiao-Xia Zhou<sup>1, 2 #</sup>, Ya-Lan Liu<sup>1#</sup>, Kan Zhai<sup>3</sup>, Huan-Zhong Shi<sup>1, 3</sup>, Zhao-Hui Tong<sup>1, 3\*</sup>

<sup>1</sup>Department of Respiratory and Critical Care Medicine, Beijing Chao-Yang Hospital, Capital Medical University, Beijing, China

<sup>2</sup>Geriatric Department, Fu Xing hospital, Capital Medical University, Beijing, China

<sup>3</sup>Medical Research Center, Beijing Chao-Yang Hospital, Capital Medical University, Beijing, China

\*Correspondence: Zhao-Hui Tong, Department of Respiratory and Critical Care Medicine, Beijing Chao-Yang Hospital, Capital Medical University, Beijing 100020, China.

E-mail: tongzhaohuicy@sina.com

# These authors contributed equally to the present work.

Supplementary Table S1. Study summary of IGRAs in body fluid

| Study                       | Country                   | HIV Subjects (%) | Subjects (n) | Disease     | IGRA type | IGRA cutoff#    | Test results |    |    |    | Quality scores |       |
|-----------------------------|---------------------------|------------------|--------------|-------------|-----------|-----------------|--------------|----|----|----|----------------|-------|
|                             |                           |                  |              |             |           |                 | TP           | FP | FN | TN | QUADAS         | STARD |
| Zhang <i>et al.</i> (2014)  | China                     | 0                | 167          | Mixed       | ELISPOT   | $\geq 6$        | 68           | 12 | 6  | 81 | 10             | 19    |
| Liao <i>et al.</i> (2014)   | China                     | 0                | 332          | Pleurisy    | ELISPOT   | $\geq 86/100^*$ | 268          | 0  | 12 | 51 | 10             | 17    |
| Liu <i>et al.</i> (2013)    | China                     | 0                | 96           | Pleurisy    | ELISPOT   | $\geq 54$       | 52           | 3  | 2  | 39 | 12             | 19    |
| Keng <i>et al.</i> (2013)   | Taiwan                    | 1.1              | 52           | Pleurisy    | ELISPOT   | $\geq 6$        | 12           | 17 | 2  | 21 | 9              | 16    |
| Kang <i>et al.</i> (2012)   | South Korea               | 0                | 36           | Pleurisy    | ELISPOT   | $\geq 75$       | 19           | 2  | 1  | 14 | 11             | 17    |
|                             |                           |                  |              |             | ELISA     | $\geq 2.745$    | 12           | 1  | 6  | 14 |                |       |
| Eldin <i>et al.</i> (2012)  | Egypt                     | Unknown          | 38           | Pleurisy    | ELISA     | $\geq 0.35$     | 12           | 3  | 8  | 15 | 11             | 16    |
| Cirak <i>et al.</i> (2012)  | Turkey                    | Unknown          | 100          | Pleurisy    | ELISA     | $\geq 0.35$     | 10           | 23 | 0  | 42 | 9              | 17    |
| Losi <i>et al.</i> (2011)   | Italy                     | 0                | 48           | Pleurisy    | ELISA     | $\geq 3.01$     | 15           | 14 | 3  | 16 | 10             | 13    |
| Ates <i>et al.</i> (2011)   | Turkey                    | Unknown          | 67           | Pleurisy    | ELISA     | $\geq 0.30$     | 21           | 3  | 4  | 23 | 10             | 17    |
| Cho <i>et al.</i> (2011)    | South Korea               | 1.8              | 50           | Peritonitis | ELISPOT   | $\geq 14$       | 11           | 2  | 1  | 12 | 13             | 19    |
| Patel <i>et al.</i> (2010)  | South Africa              | 87.1             | 86           | Meningitis  | ELISPOT   | $\geq 46$       | 31           | 3  | 5  | 40 | 9              | 18    |
| Kim <i>et al.</i> (2010)    | South Korea               | 2.3              | 84           | Meningitis  | ELISPOT   | $\geq 6$        | 13           | 3  | 9  | 25 | 10             | 18    |
| Liao <i>et al.</i> (2009)   | Taiwan                    | 2.9              | 138          | Mixed       | ELISPOT   | $\geq 10$       | 13           | 11 | 4  | 14 | 11             | 19    |
| Lee <i>et al.</i> (2009)    | Taiwan                    | 0                | 40           | Pleurisy    | ELISPOT   | $\geq 10$       | 18           | 3  | 1  | 18 | 11             | 16    |
| Dheda <i>et al.</i> (2009)  | South Africa              | 46.4             | 56           | Pleurisy    | ELISPOT   | $\geq 24$       | 34           | 6  | 6  | 9  | 9              | 18    |
|                             |                           |                  |              |             | ELISA     | $\geq 0.35$     | 22           | 3  | 19 | 12 |                |       |
| Chegou <i>et al.</i> (2008) | South Africa              | 64.3             | 39           | Pleurisy    | ELISA     | $\geq 0.35$     | 13           | 2  | 10 | 13 | 11             | 15    |
| Baba <i>et al.</i> (2008)   | South Africa              | 73.5             | 13           | Pleurisy    | ELISA     | $\geq 0.35$     | 3            | 0  | 0  | 3  | 10             | 17    |
| Thomas <i>et al.</i> (2008) | India, UK, German         | 0                | 19           | Meningitis  | ELISPOT   | $\geq 6$        | 9            | 0  | 1  | 7  | 10             | 19    |
| Kim <i>et al.</i> (2008)    | South Korea               | 5.4              | 33           | Meningitis  | ELISPOT   | $\geq 20$       | 3            | 3  | 1  | 9  | 11             | 19    |
| Losi <i>et al.</i> (2007)   | Italy, German, Netherland | Unknown          | 41           | Pleurisy    | ELISPOT   | $\geq 6$        | 19           | 5  | 1  | 16 | 9              | 14    |

|                                |       |   |      |          |         |              |    |   |   |    |    |    |
|--------------------------------|-------|---|------|----------|---------|--------------|----|---|---|----|----|----|
| Ariga <i>et al.</i> (2007)     | Japan | 0 | 75   | Mixed    | ELISA   | $\geq 2.352$ | 27 | 1 | 1 | 46 | 10 | 19 |
| Wilkinson <i>et al.</i> (2005) | UK    | 0 | 16   | Pleurisy | ELISPOT | $\geq 10$    | 8  | 1 | 0 | 7  | 10 | 11 |
| Total                          |       |   | 1626 |          |         |              |    |   |   |    |    |    |

# Unit for cutoff value was SFCs per  $2 \times 10^5$  cells for ELISPOT and for ELISA

\*cut-off value was determined by receiver operating characteristic (ROC) analysis. Eighty-six SFCs for ESAT-6 protein and 100 SFCs for peptide pool.

Supplementary Table S2. Study summary of IGRAs in peripheral blood

| Study                          | Country                   | Subjects (n) | Disease     | IGRA type | IGRA cutoff# | Test results |    |     |     |
|--------------------------------|---------------------------|--------------|-------------|-----------|--------------|--------------|----|-----|-----|
|                                |                           |              |             |           |              | TP           | FP | FN  | TN  |
| Zhang <i>et al.</i> (2014)     | China                     | 167          | Mixed       | ELISPOT   | ≥6           | 54           | 25 | 20  | 68  |
| Liao <i>et al.</i> (2014)      | China                     | 332          | Pleurisy    | ELISPOT   | ≥40/30*      | 220          | 7  | 61  | 44  |
| Liu <i>et al.</i> (2013)       | China                     | 96           | Pleurisy    | ELISPOT   | ≥6           | 51           | 16 | 4   | 27  |
| Kang <i>et al.</i> (2012)      | South Korea               | 36           | Pleurisy    | ELISPOT   | ≥21          | 17           | 2  | 4   | 13  |
|                                |                           |              |             | ELISA     | ≥0.175       | 17           | 5  | 4   | 10  |
| Eldin <i>et al.</i> (2012)     | Egypt                     | 38           | Pleurisy    | ELISA     | ≥0.35        | 14           | 4  | 6   | 14  |
| Losi <i>et al.</i> (2011)      | Italy                     | 48           | Pleurisy    | ELISA     | ≥2.73        | 14           | 11 | 4   | 19  |
| Ates <i>et al.</i> (2011)      | Turkey                    | 67           | Pleurisy    | ELISA     | ≥0.35        | 30           | 10 | 12  | 15  |
| Cho <i>et al.</i> (2011)       | South Korea               | 50           | Peritonitis | ELISPOT   | ≥21          | 21           | 1  | 7   | 20  |
| Patel <i>et al.</i> (2010)     | South Africa              | 86           | Meningitis  | ELISPOT   | ≥48          | 31           | 21 | 6   | 29  |
| Kim <i>et al.</i> (2010)       | South Korea               | 84           | Meningitis  | ELISPOT   | ≥6           | 22           | 23 | 9   | 30  |
| Liao <i>et al.</i> (2009)      | Taiwan                    | 138          | Mixed       | ELISPOT   | ≥10          | 10           | 7  | 2   | 23  |
| Lee <i>et al.</i> (2009)       | Taiwan                    | 40           | Pleurisy    | ELISPOT   | ≥10          | 14           | 2  | 4   | 19  |
| Dhedra <i>et al.</i> (2009)    | South Africa              | 56           | Pleurisy    | ELISPOT   | ≥24          | 30           | 7  | 6   | 9   |
|                                |                           |              |             | ELISA     | ≥0.35        | 27           | 5  | 4   | 11  |
| Chegou <i>et al.</i> (2008)    | South Africa              | 39           | Pleurisy    | ELISA     | ≥0.35        | 16           | 5  | 6   | 12  |
| Baba <i>et al.</i> (2008)      | South Africa              | 13           | Pleurisy    | ELISA     | ≥0.35        | 7            | 0  | 1   | 5   |
| Thomas <i>et al.</i> (2008)    | India, UK, German         | 19           | Meningitis  | ELISPOT   | ≥6           | 9            | 2  | 2   | 6   |
| Kim <i>et al.</i> (2008)       | South Korea               | 33           | Meningitis  | ELISPOT   | ≥6           | 9            | 9  | 0   | 15  |
| Losi <i>et al.</i> (2007)      | Italy, German, Netherland | 41           | Pleurisy    | ELISPOT   | ≥6           | 18           | 7  | 2   | 14  |
| Ariga <i>et al.</i> (2007)     | Japan                     | 75           | Mixed       | ELISA     | ≥0.281       | 21           | 14 | 6   | 33  |
| Wilkinson <i>et al.</i> (2005) | UK                        | 16           | Pleurisy    | ELISPOT   | ≥6           | 8            | 0  | Nil | Nil |

# Unit for cutoff value was SFCs per  $2 \times 10^5$  cells for ELISPOT and IU/ml for ELISA

\*cut-off value was determined by receiver operating characteristic (ROC) analysis: 40 SFCs for ESAT-6 protein and 30 SFCs for peptide pool.

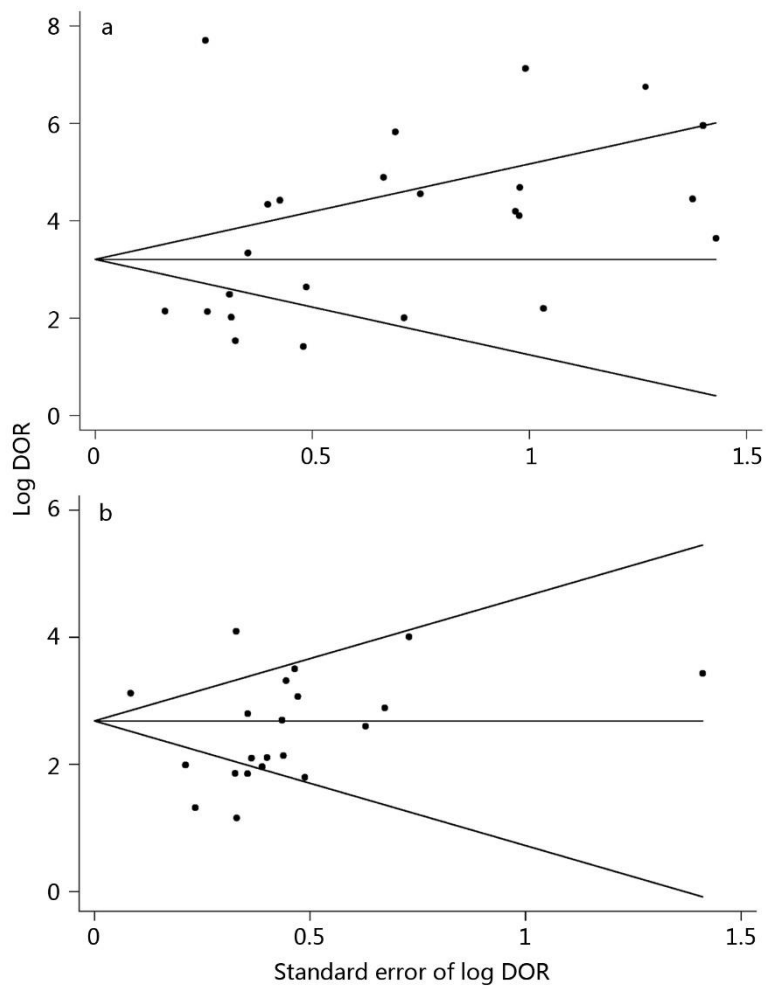

Supplementary Figure S1. Funnel graph for the assessment of potential publication bias in studies of IGRAs in body fluid (a) and peripheral blood (b). Solid circles indicate each study in the meta-analysis. The central lines represent the summary diagnostic odds ratio (DOR).
